# Supplementary material
Source: Springer Nature journal article supplement (https://www.springermedizin.de/resource/supplementary/12943_2013_1211_MOESM8_ESM.pdf/9552398)

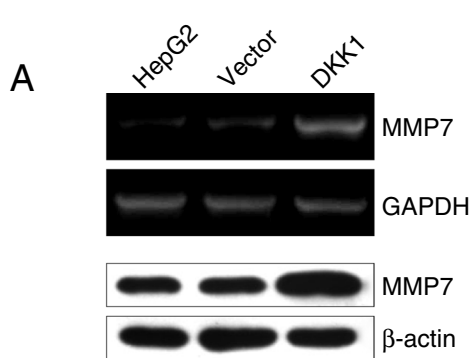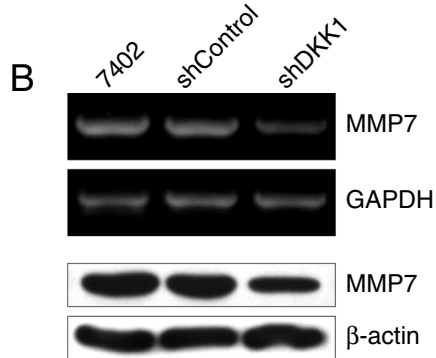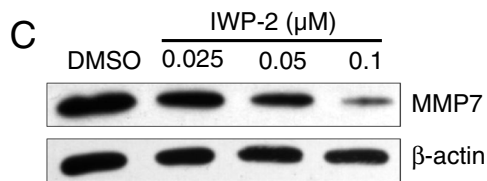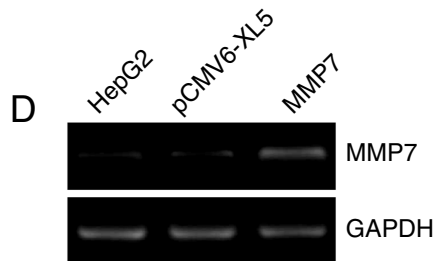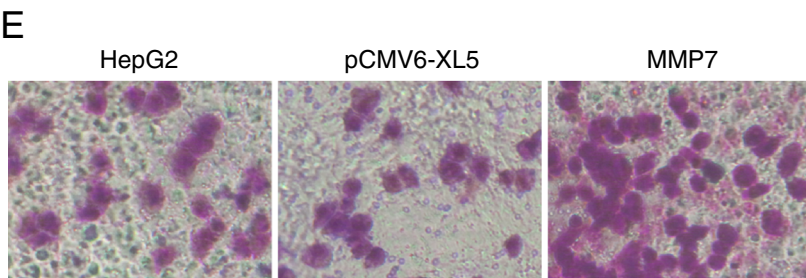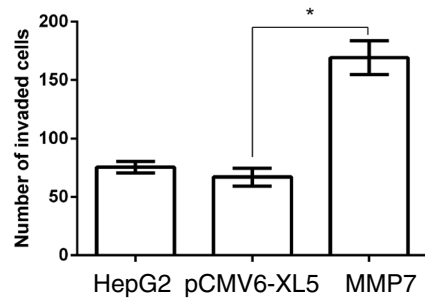

Supplement: MOESM8 [file 9552398]
